# Supplementary material for: Expiratory aerosol particle escape from surgical masks due to imperfect sealing
Source: Research Square preprint supplement (doi:10.21203/rs.3.rs-142138/v1), 2021-01-12
Supplement: Supplementary file 1 [file b31584086e047e9996969019.docx]

Supplemental material for “Expiratory aerosol particle escape from surgical masks due to imperfect sealing”

Christopher D. Cappa1,*,Sima Asadi2,§, Santiago Barreda3, Anthony S. Wexler2,4,5,6, Nicole M. Bouvier7,8, & William D. Ristenpart2

1 Dept. of Civil and Environmental Engineering, Univ. of California Davis, 1 Shields Ave., Davis, CA 95616 USA

2 Dept. of Chemical Engineering, Univ. of California Davis, 1 Shields Ave., Davis, CA 95616 USA.

3 Dept. of Linguistics, Univ. of California Davis, 1 Shields Ave., Davis, CA 95616 USA.

4 Dept. of Mechanical and Aerospace Engineering, Univ. of California Davis, 1 Shields Ave., Davis, CA 95616 USA.

5 Air Quality Research Center, Univ. of California Davis, 1 Shields Ave., Davis, CA 95616 USA.

6 Dept. of Land, Air and Water Resources, Univ. of California Davis, 1 Shields Ave., Davis, California 95616 USA.

7 Dept. of Medicine, Div. of Infectious Diseases, Icahn School of Medicine at Mount Sinai, 1 Gustave Levy Place, New York, NY 10029 USA.

8 Dept. Microbiology, Icahn School of Medicine at Mount Sinai, 1 Gustave Levy Place, New York, NY 10029 USA.

§ Now at: Dept. of Chemical Engineering, Massachusetts Institute of Technology, 77 Massachusetts Av., Cambridge, MA 02139 USA.

*Corresponding author: cdcappa@ucdavis.edu


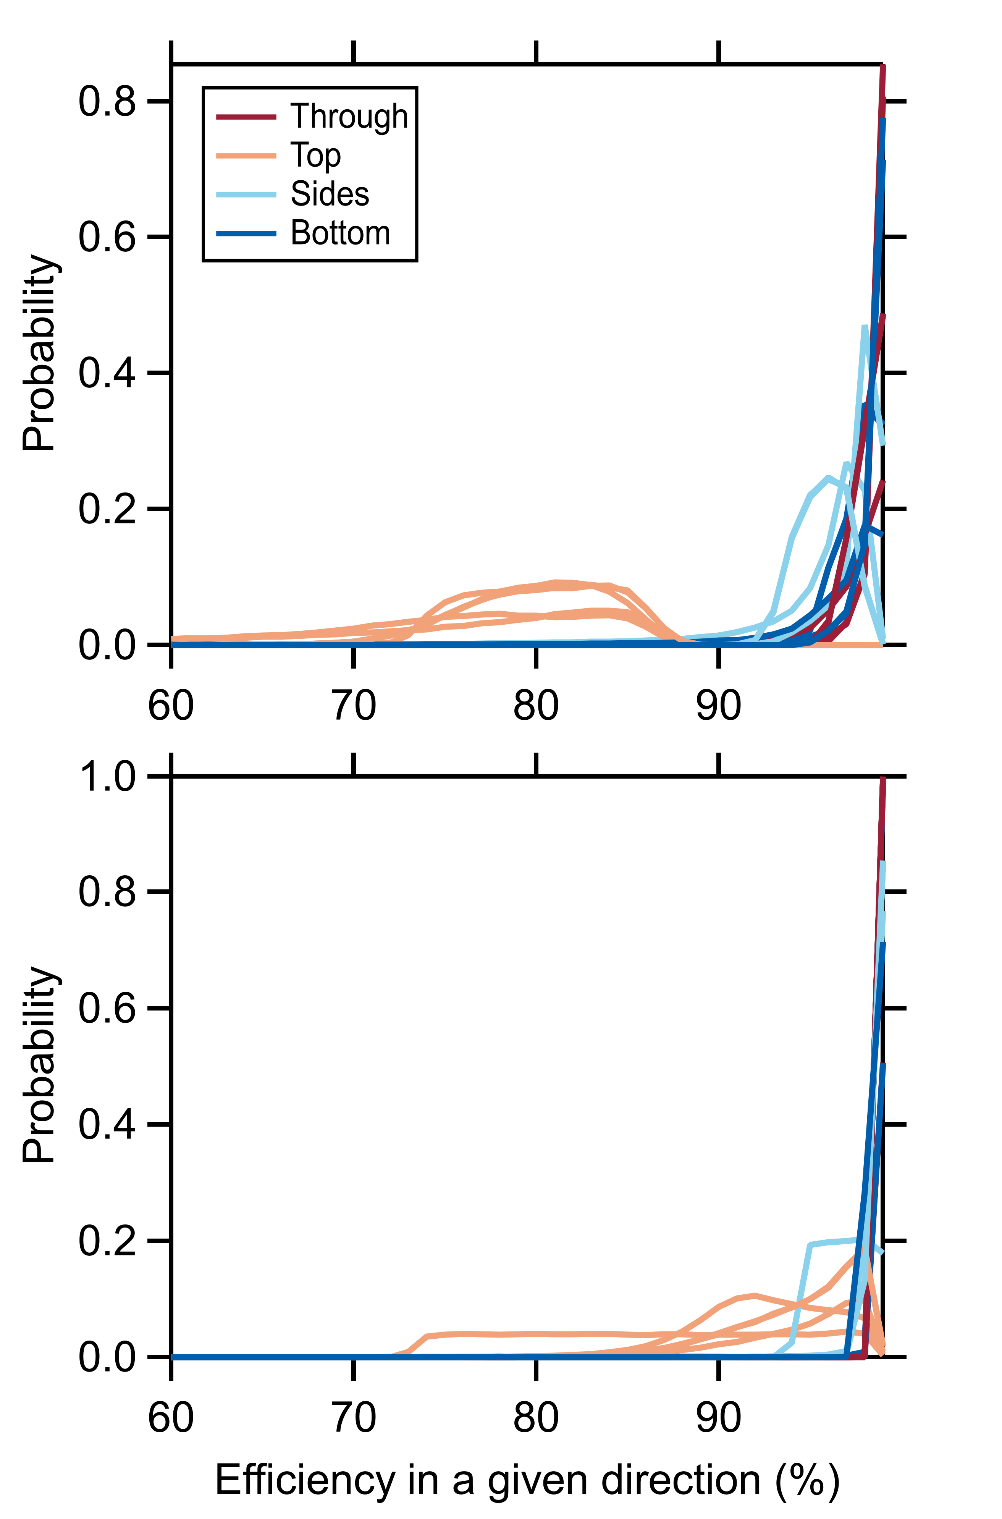


Figure S1. The direction-specific, flow-corrected efficiencies derived from each of the five simulations. The lines are colored according to the flow direction, and are not distinguished between the simulations.
